# Supplementary material
Source: PubMed Central journal article supplement (PMC3378055)

Type of file: figure

Label: Suppl Fig 1

Filename: onc201016x1.ppt

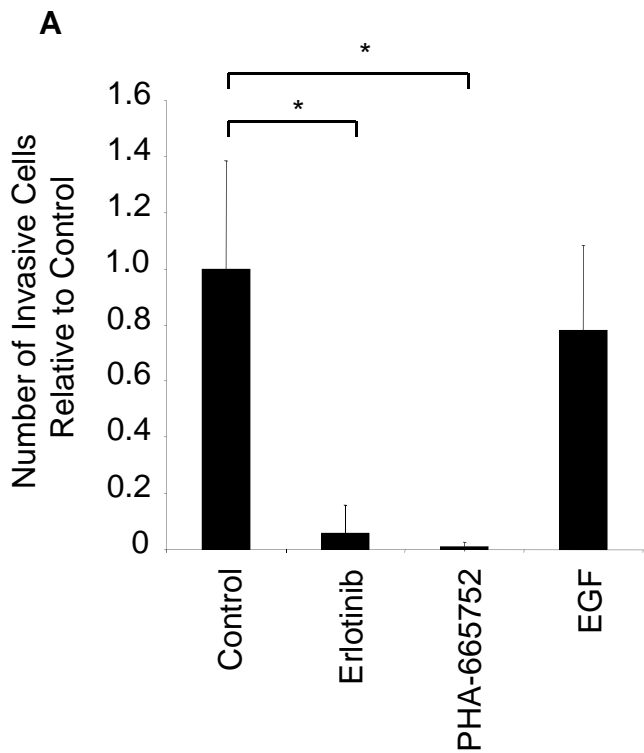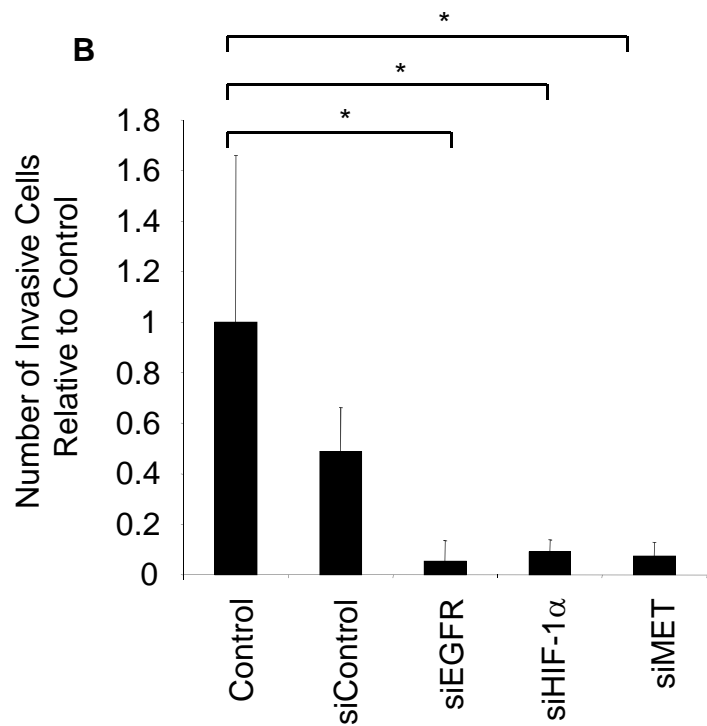

Type of file: figure

Label: Suppl Fig 2

Filename: onc201016x2.ppt

**A**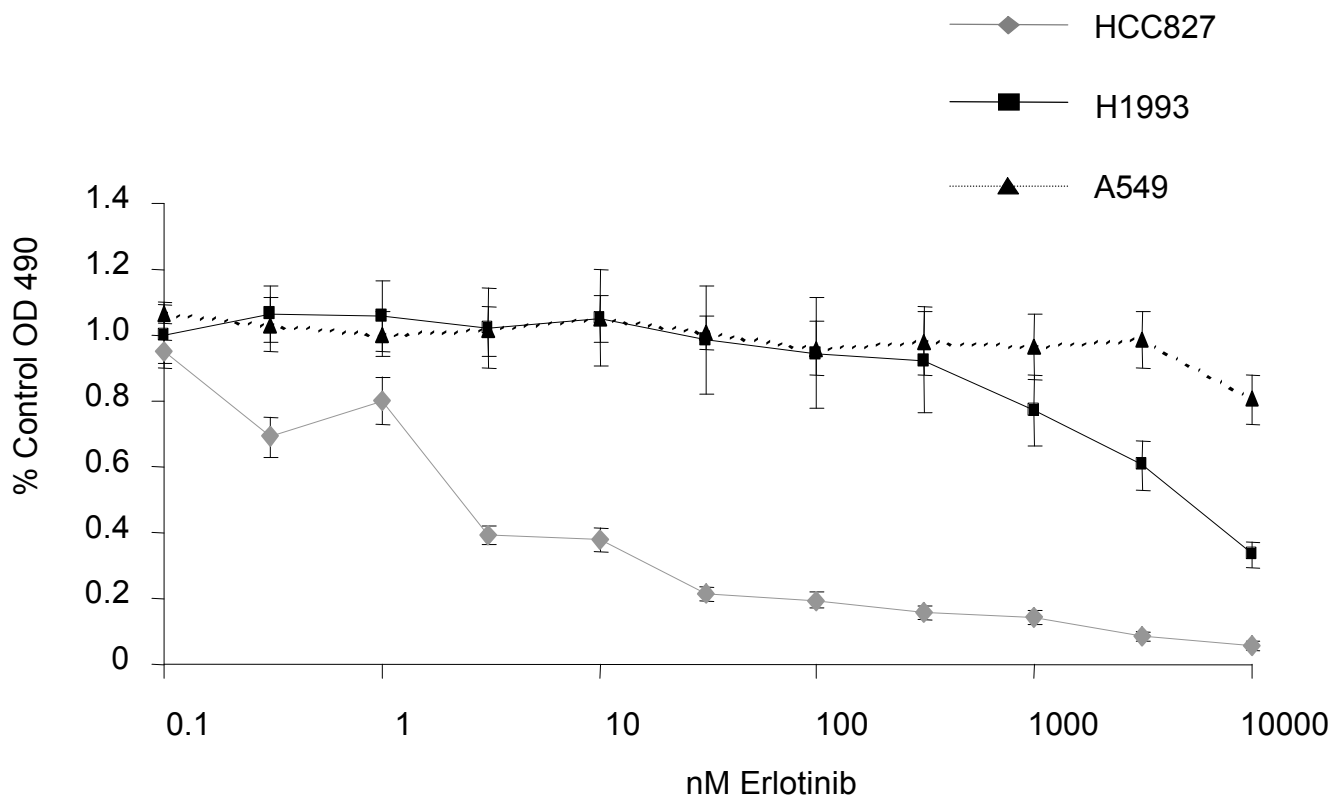**B**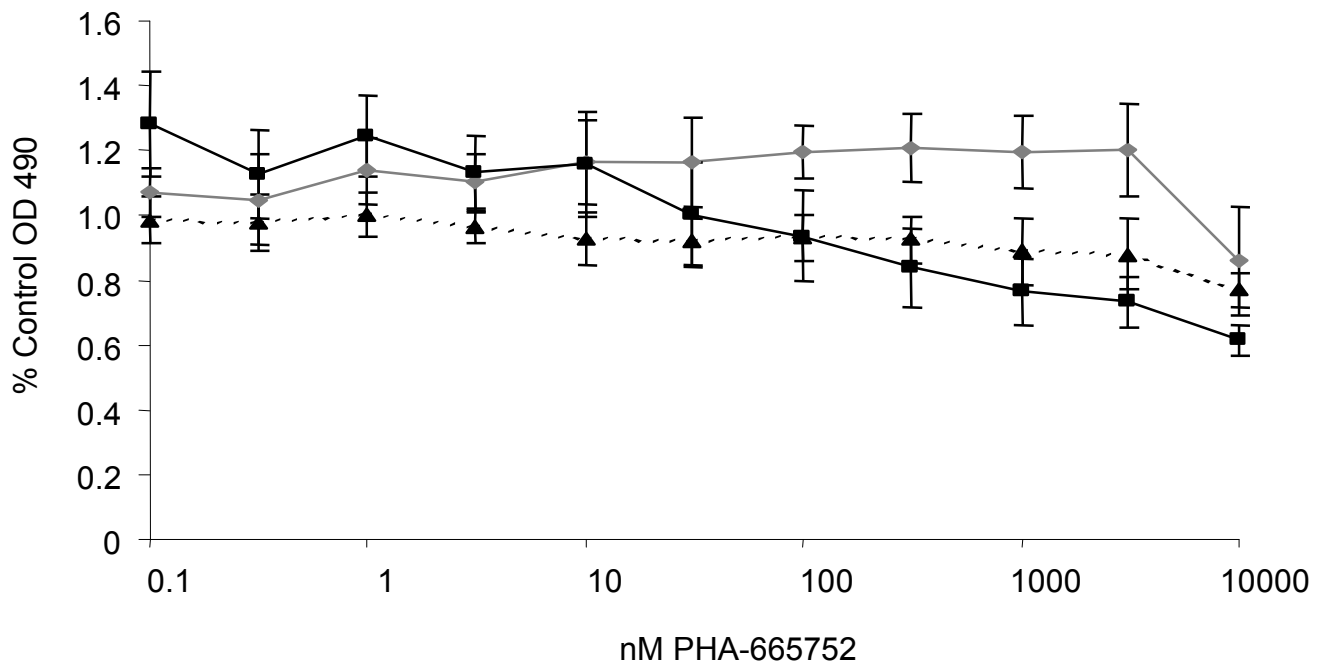

Supplement: NIHMS381435-supplement-01.pdf [file NIHMS381435-supplement-01.pdf]
